# Supplementary material for: Wnt ligands regulate Tkv expression to constrain Dpp activity in the Drosophila ovarian stem cell niche
Source: PubMed Central journal article supplement — J Cell Biol. 2015 May 25;209(4):595–608. doi: 10.1083/jcb.201409142 (PMC4442805; doi:10.1083/jcb.201409142), 2015-05-25
Supplement: supp_jcb.201409142_JCB_201409142_sm.pdf [file supp_jcb.201409142_JCB_201409142_sm.pdf]

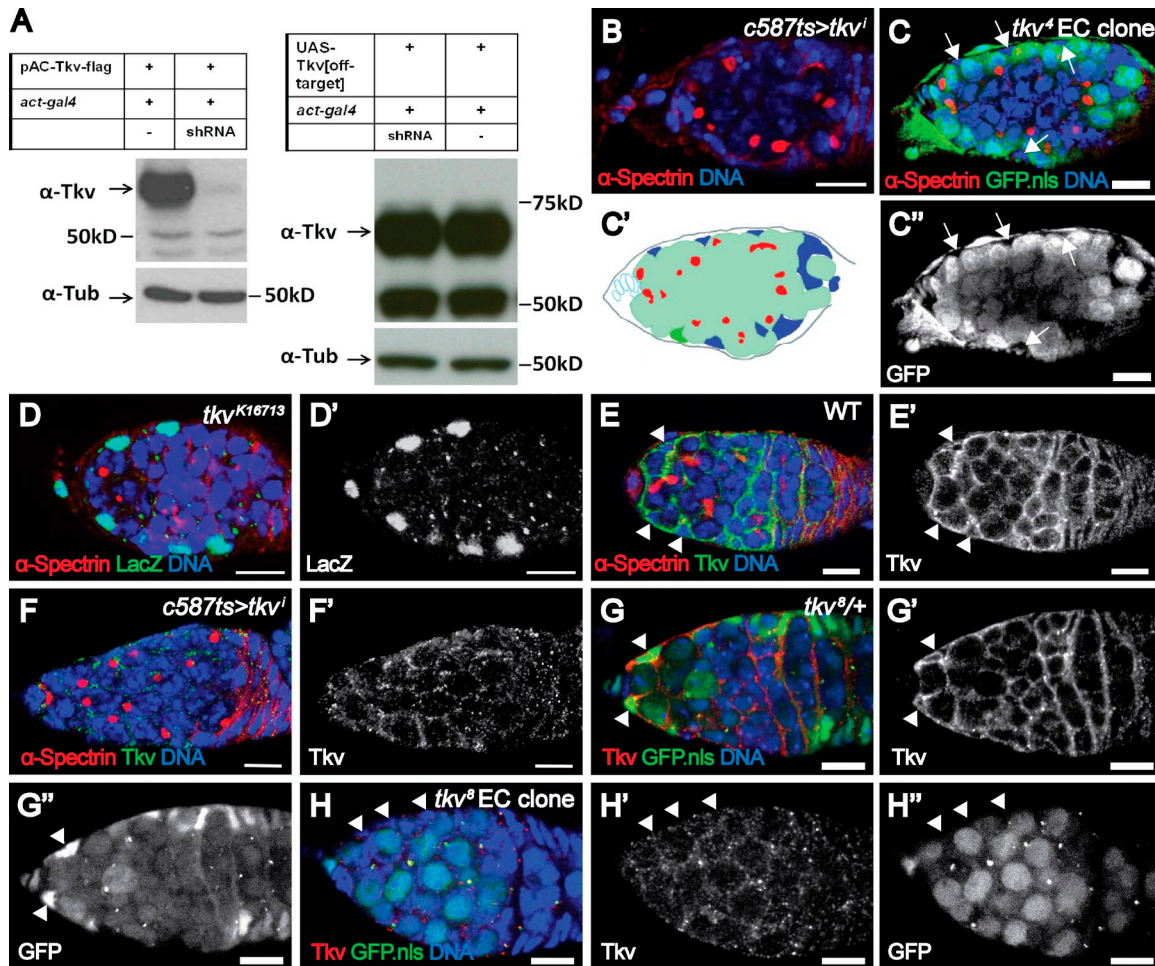

Figure S1. **Tkv functions in ECs.** (A) Western blotting results show that *tkv* shRNA (based on the construct used in BL40937) effectively knocked down the WT (left) but not the off-target (right) Tkv variant in S2 cells. (B) A *tkv<sup>l</sup>* (v105834) germarium exhibits more spectrosome-containing cells. (C) A germarium carrying ECs mutant for *tkv<sup>l</sup>* (arrows) exhibits more spectrosome-containing cells. (C') A cartoon illustrating positions of mutant ECs (blue). (D) A *Tkv<sup>K16713</sup>* reporter is expressed in ECs. (E and F) Tkv is strongly expressed in ECs of the WT germarium (E, arrowheads) but not of the *tkv<sup>l</sup>* (v105834) germarium (F). (G and H) Tkv is strongly detected in ECs (two ECs marked by arrowheads) of the *tkv<sup>9/+</sup>* germarium, but strongly reduced in ECs (arrowheads) mutant for *tkv<sup>9</sup>*. Bars, 10  $\mu$ m.

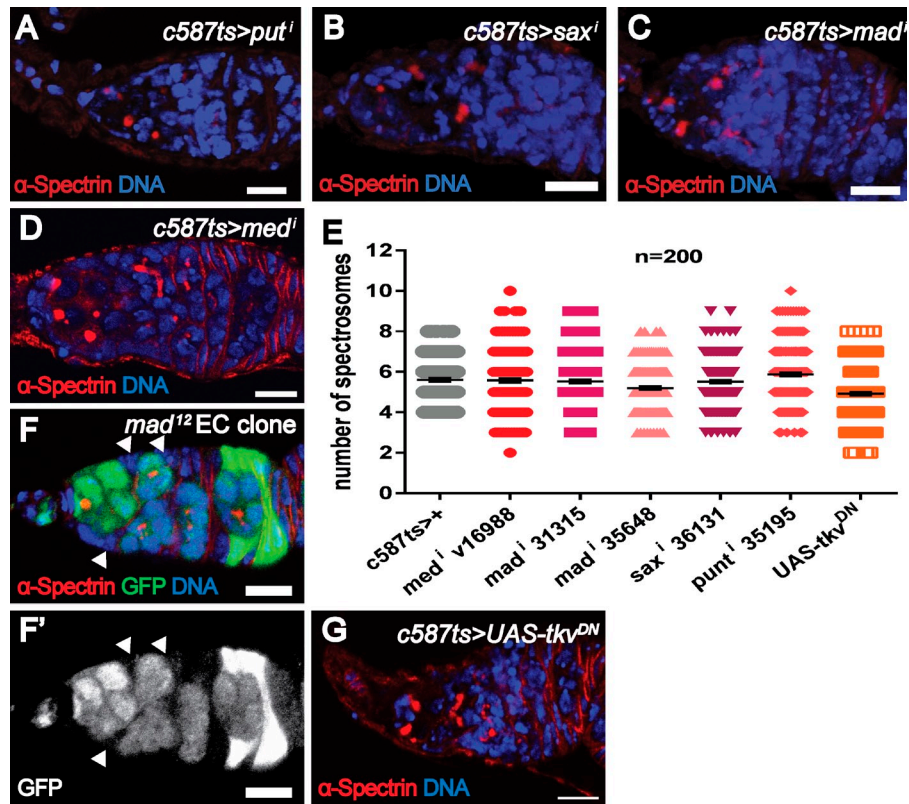

Figure S2. **Tkv functions independently of the canonical Dpp signaling pathway.** (A–D) Germaria with compromised canonical Dpp signaling components including Put (A, BL-35195), Sax (B, BL-36131), Mad (C, BL-31315), and Med (D, v16988) in ECs do not exhibit more spectroscome-containing cells. (E) Statistical data for spectroscome counts in these backgrounds. (F) A germarium containing ECs mutant for *mad<sup>12</sup>* (arrowheads) does not exhibit more spectroscome-containing cells. Genotype: *c587.UAS-flp; FRT40A.ubi-GFP/FRT40A.mad<sup>12</sup>*. (G) A germarium with ectopic Tkv<sup>DN</sup> expression in the ECs does not exhibit more spectroscome-containing cells (see E for statistical data). Bars, 10 μm.

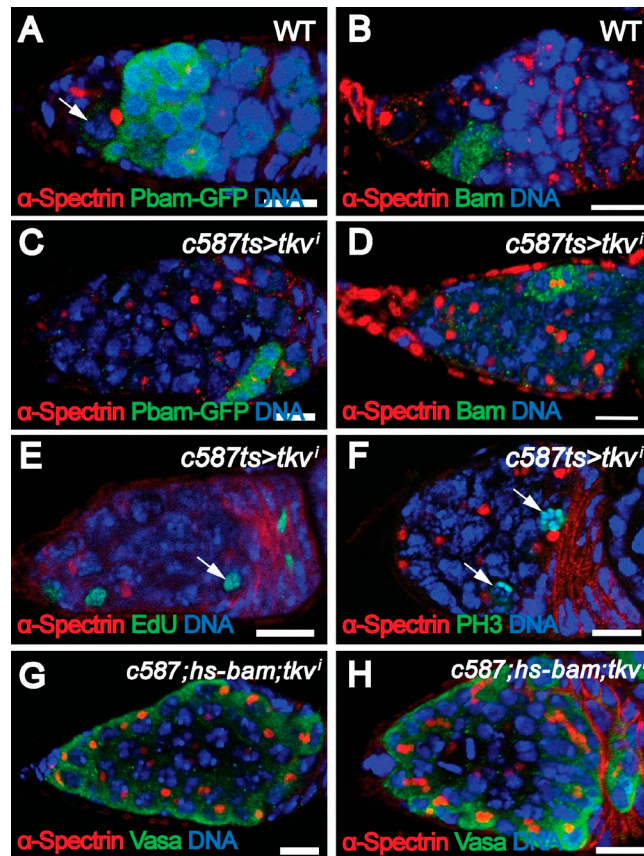

Figure S3. **EC-expressed Tkv restricts germline proliferation.** (A) A control (*Pbam-GFP/+*) germarium showing Pbam-GFP expression in the CB (arrow) and cyst. (B) A WT germarium showing Bam expression in the cyst. (C) A *tkv* (BL40937) germarium contains many cells with low/no Pbam-GFP expression. (D) A *tkv* (v3059) germarium exhibits ectopic spectrosome-containing cells that do not express Bam. (E and F) Some of the ectopic spectrosome-containing cells in *tkv* (v3059) germarium are positive for EdU (E, arrow) or anti-phosphorylated Histone 3 (pH3; F, arrows). (G and H) Ectopic Bam expression in *tkv* germarium (G) promotes the differentiation of spectrosome-containing cells (H). Bars, 10  $\mu$ m.

**Figure S4. Wnt signaling modulates Tkv expression in ECs.** (A–E) Knockdown of Wnt signaling components, including Dsh (A and B, BL-31306), Pygo (C, NIG-11518R-1), and Lgs (D, BL-37476), in the ECs leads to the formation of ectopic spectrosome-containing cells and the down-regulation of *tkv*<sup>K16713</sup> reporter expression (compared with Fig. S1 D). (E) Statistical analyses of spectrosome-containing cell number in *pygo*<sup>i</sup> or *lgs*<sup>i</sup> germaria. (F) The overexpression of Arm<sup>S10</sup> in the ECs of a *dsh*<sup>i</sup> (BL-31316) germarium suppresses the formation of ectopic spectrosome-containing cells. (G) A *arm*<sup>i</sup> (v107344) germarium showing ectopic low levels of Pbam-GFP-expressing cells. (H) Bam is not detected in the ectopic spectrosome-containing cells in a *pygo*<sup>i</sup> (NIG-11518R-1) germarium. (I) A *pygo*<sup>i</sup> (BL-38208) germarium showing that *dpp* mRNA is detected only in the cap cells. (J) Quantitation of *dpp* mRNA level in *bam*<sup>Δ86</sup> and *pygo*<sup>i</sup>; *bam*<sup>Δ86</sup> germaria. (K and L) knockdown of Dpp in the ECs of *arm*<sup>i</sup> (BL-35004) germarium does not suppress the formation of ectopic spectrosome-containing cells. (M–P) knockdown of Put in the germline in *lgs*<sup>i</sup> (BL-37476) germarium suppresses the formation of ectopic spectrosome-containing cells. (Q) dpERK is detected in the ECs (arrows) of a *dsh*<sup>i</sup> (BL-31306) germarium, similar to WT germarium (Fig. 3 A). (R–S) *dally* (shown by in situ hybridization and reporter expression) is normally expressed in a *pygo*<sup>i</sup> (NIG-11518R-1) germarium (arrows indicate cap cells). (T) Knocking down Dally in the ECs of a *pygo*<sup>i</sup> (NIG-11518R-1) germarium does not suppress the formation of ectopic spectrosome-containing cells. (U and V) *tkv* mRNA is down-regulated in *pygo*<sup>i</sup> (U, NIG-11518R-1) and *dsh*<sup>i</sup> (V, BL-31316) germaria. (W) Tkv is reduced in the *dsh*<sup>i</sup> (BL-31316) germarium. (X–Z) The expression of Tkv in ECs of the *pygo*<sup>i</sup> (NIG-11518R-1) germarium strongly suppresses the formation of ectopic spectrosome-containing cells. Error bars represent SEM. \*\*\*, P < 0.001. Bars, 10 μm.

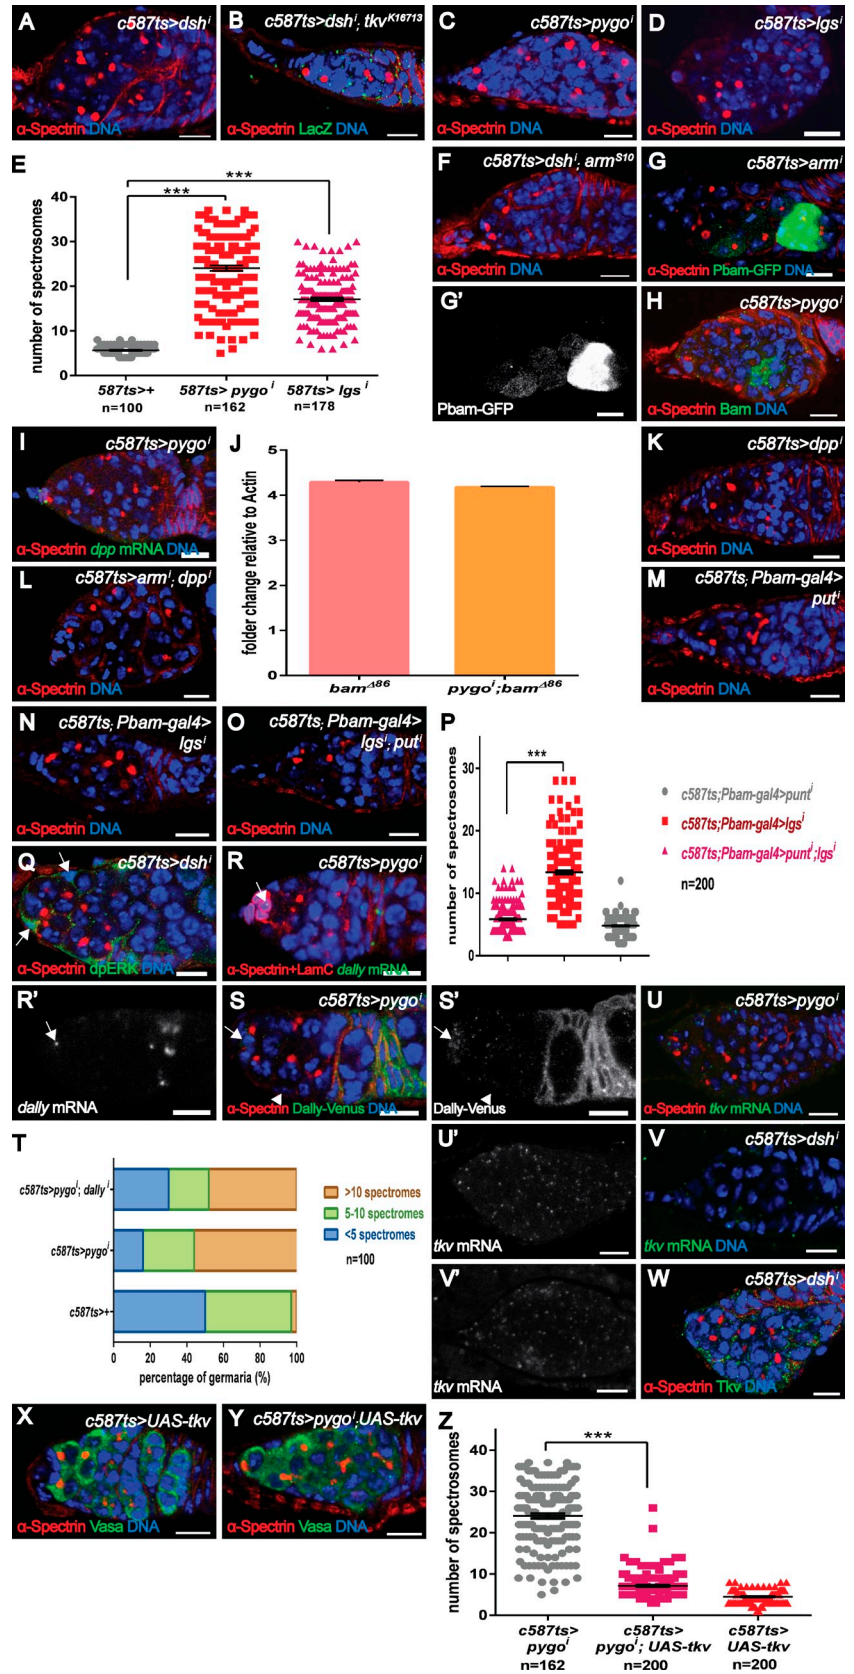

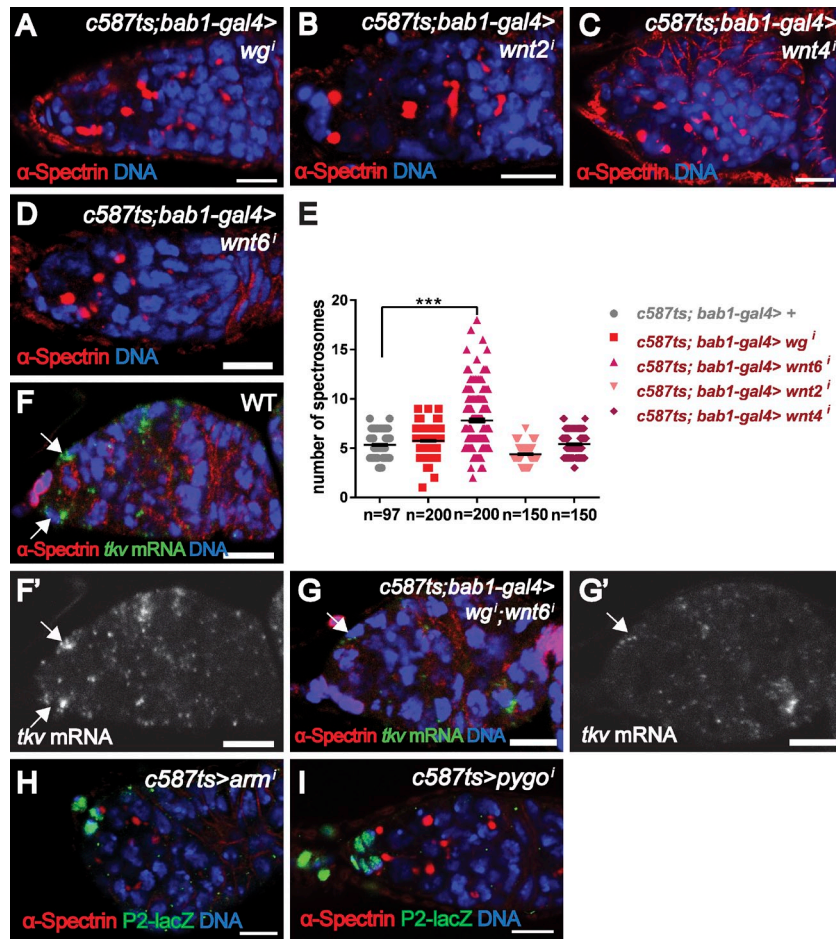

Figure S5. **The function of Wnts in the germarium.** Knockdown of Wg (A, v104579), Wnt2 (B, v104338), or Wnt4 (C, BL-29442) using *c587ts;bab1-gal4* does not result in the formation of ectopic spectroosome-containing cells. (D) Removing Wnt6 (BL-30493) from cap cells and ECs leads to a slight increase in the number of spectroosomes. (E) Statistical analyses of the number of spectroosomes in A–D. (F–G) *tkv* mRNA is down-regulated in the ECs (arrows) of a germarium with compromised Wg and Wnt6 functions in cap cells and ECs. (H and I) The P2-lacZ reporter is down-regulated in the ECs of *arm<sup>i</sup>* (F, BL-35004) and *pygo<sup>i</sup>* (G, BL-38208) germaria. \*\*\*,  $P < 0.001$ . Bars, 10  $\mu\text{m}$ .

Table S1. **Primers used to generate *tkv* reporter lines**

| Name | Location          | Primers                                                           |
|------|-------------------|-------------------------------------------------------------------|
| P1   | 2L:5231kb..5237kb | 5'-tggatgcgctcgggagacaggag-3'<br>5'-ctggagatgctgcttacagcagag-3'   |
| P2   | 2L:5237kb..5245kb | 5'-ggatgggattgtatggacggagtg-3'<br>5'-atccgcagttaaggcatatcctgtg-3' |

Table S2. Primers for ChIP experiment

| Name | Forward primer                | Reverse primer               |
|------|-------------------------------|------------------------------|
| 1    | 5'-tcctgtgtgtttctggtgtt-3'    | 5'-gcatcaacggcaatctatagt-3'  |
| 2    | 5'-tcttcttggctctctccctt-3'    | 5'-gcactgcgatgtaactcaa-3'    |
| 3    | 5'-actcctggcattaaaaacgca-3'   | 5'-tttaagttcgggagggcataga-3' |
| 4    | 5'-tcggggtctgctctgctt-3'      | 5'-tcagcagccacatccacaat-3'   |
| 5    | 5'-tacaatatactgtggcgcta-3'    | 5'-ctgtcaatcttcaagcgtag-3'   |
| 6    | 5'-aggttgattctagccatacata-3'  | 5'-tggatggaatagtgttcccc-3'   |
| 7    | 5'-gtgtgttgggtgtgtgtaa-3'     | 5'-tgcaaaagtgtgcaagaacga-3'  |
| 8    | 5'-aggcgcgtcaaacataattg-3'    | 5'-tccctccttggcattaagt-3'    |
| 9    | 5'-ggggatactaaccactatact-3'   | 5'-aacttatgatcataaactcgg-3'  |
| 10   | 5'-caaaaaaggagagcgggt-3'      | 5'-tatttcagggcggcaca-3'      |
| 11   | 5'-aaaggggttaggcctcctg-3'     | 5'-agcccaaccacttttctg-3'     |
| 12   | 5'-gtgtaaattatgggaaccgc-3'    | 5'-aggcactttcagtaacaaata-3'  |
| 13   | 5'-atgtgggtgcagcaaaaga-3'     | 5'-agccaatttgcacgtgctcc-3'   |
| 14   | 5'-tgacagtttaacagccgca-3'     | 5'-tgggctgcaggtgttctt-3'     |
| 15   | 5'-gattgtaaagtcaaggcatgc-3'   | 5'-cagaccacccaattgatt-3'     |
| 16   | 5'-gttgtgggttcgggttcata-3'    | 5'-agaacgtgtgacttaccgaa-3'   |
| 17   | 5'-gttttgaaactgggtcgtcg-3'    | 5'-ctattttggatggccaatgc-3'   |
| 18   | 5'-gcatcggcgtgtgaacatta-3'    | 5'-cgcgtaggcagaatgtgtaa-3'   |
| -1   | 5'-aacatgaagaagaaggattg-3'    | 5'-gataacctattcattgcaagct-3' |
| -2   | 5'-tgggtaagaactggtaagatc-3'   | 5'-agggctttaagcagatactatt-3' |
| -3   | 5'-tgacttttaccatcgcagcc-3'    | 5'-ctacttttggctccaacctt-3'   |
| -4   | 5'-cctggactttgccaccattt-3'    | 5'-cccaaagtcagtcgaaatgg-3'   |
| N4   | 5'-tcaatcagacgtcagaggtaccg-3' | 5'-ctgatggaagaaccgtgtgg-3'   |

Table S3. Primers used for quantitative real-time PCR

| Name            | Forward primer              | Reverse primer              |
|-----------------|-----------------------------|-----------------------------|
| <i>dpp</i>      | 5'-ccgctcctgttcacctacac-3'  | 5'-gggtcgtcgtgggtgttg-3'    |
| <i>actin 5c</i> | 5'-ggatctccaagcaggagtagc-3' | 5'-tcctccagcagaatcaagacc-3' |

Table S4. Primers used for in situ experiments

| Name         | Forward primer                | Reverse primer                             |
|--------------|-------------------------------|--------------------------------------------|
| <i>wnt2</i>  | 5'-tacatccgctcatgctctgtgg-3'  | 5'-gacttcgctcgcagtagttgg-3'                |
| <i>wnt4</i>  | 5'-aatgctggtcaggtggtaac-3'    | 5'-cgtgcttcagattgtcattgc-3'                |
| <i>wnt5</i>  | 5'-ttgcacaacatgaccaagacc-3'   | 5'-cgtgacggatggtgttctc-3'                  |
| <i>wnt6</i>  | 5'-caccacaacatccttctcgatcc-3' | 5'-ctcagccagcaggtcttcac-3'                 |
| <i>wnt10</i> | 5'-ctccaagctcttctcgactg-3'    | 5'-ttcttatgcatgtggctgagg-3'                |
| <i>wg</i>    | 5'-ggctcgaaggaccttgtctatc-3'  | 5'-atgcaagcagttcaagcagtg-3'                |
| <i>tkv</i>   | 5'-ctacaagcgcgagcagaagctgc-3' | 5'-gagaccactgaatacatatcag-3'               |
| <i>dally</i> | 5'-cgtgtgtgccagtggtgtg-3'     | 5'-taatacgactcactataggcggcctgtgtatctatg-3' |
| <i>dpp</i>   | 5'-aggacgatctggatctagatcgg-3' | 5'-actttggtcgttgatagagcat-3'               |

Table S5. Primers used for generating constructs of luciferase assay

| Name | Forward primer             | Reverse primer               |
|------|----------------------------|------------------------------|
| #1   | 5'-tttctgtttgccccgtaggt-3' | 5'-caatccgcagtttaaggcatat-3' |
| #2   | 5'-ccaccagcaatttgcaatc-3'  | 5'-gcaactgtcccctcgaaatt-3'   |
| #3   | 5'-tggatgggattgtatggacg-3' | 5'-acgcaatgagcgcgacttga-3'   |

Table S6. Primers used for antibody generation

| Name              | Forward primer                 | Reverse primer                     |
|-------------------|--------------------------------|------------------------------------|
| <i>Tkv</i>        | 5'-caccatggcggcggcgtttgagtg-3' | 5'-tcagttgcagaagtcctccttgcgcagc-3' |
| <i>α-Spectrin</i> | 5'-gtgaagatcctcgacagtcgag-3'   | 5'-tgcaggtagtaggactcatc-3'         |
